# Supplementary material
Source: PubMed Central journal article supplement (PMC4343097)
Supplement: pnas.201416485SI.pdf [file pnas.201416485SI.pdf]

# Supporting Information

Huynh et al. 10.1073/pnas.1416485112

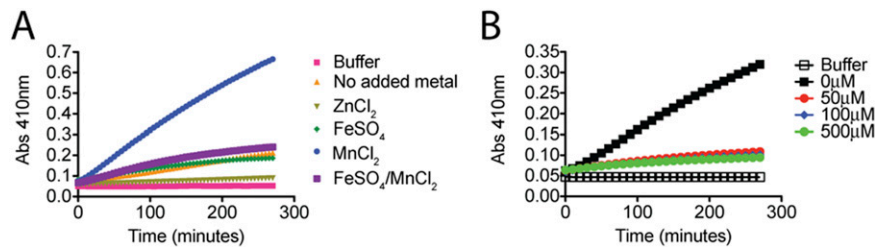

**Fig. S1.** Bis-PNPP hydrolysis activity of PgpH HD domain, related to Fig. 2. (A) Hydrolysis of Bis-pNPP to paranitrophenol was monitored at 410 nm in the presence of PgpH HD protein expressed with different metal ions. (B) Hydrolysis of Bis-pNPP by MBP-HD (Mn preparation) in the presence of increasing concentrations of c-di-AMP.

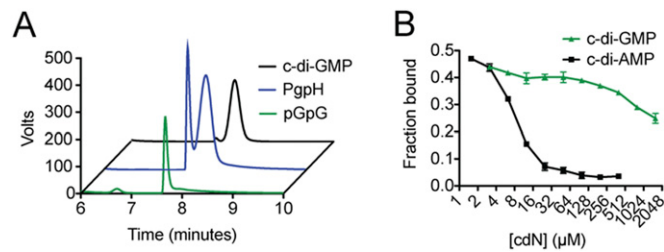

**Fig. S2.** c-di-GMP hydrolysis and interaction. (A) Hydrolysis of c-di-GMP into 5'-pGpG. Twenty micromolar MBP-HD (Mn preparation) was incubated with 100 μM c-di-GMP in storage buffer at room temperature for 22 h and analyzed with HPLC. (B) Competition titration DRCALA assays. Varying concentrations of unlabeled c-di-AMP or c-di-GMP were added to compete with bound <sup>32</sup>P-c-di-AMP.

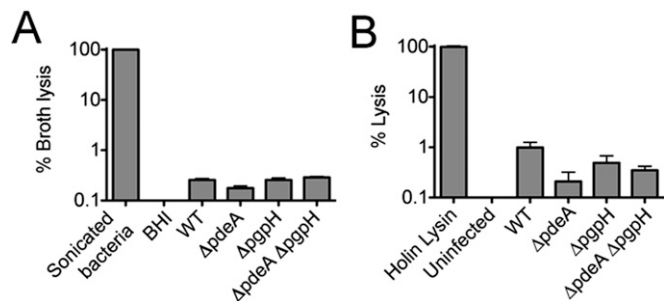

**Fig. S3.** Broth and intracellular lysis of *L. monocytogenes* strains, related to Fig. 6. (A) Lysis of the listed strains was quantified by monitoring the release of β-galactosidase into broth media (BHI). Lysis is reported based on the β-galactosidase enzymatic activity in sterile media (0% lysis) and sonicated bacteria (100% lysis). (B) Bone marrow-derived macrophages were infected with the indicated strains harboring a plasmid-encoding Luciferase driven by a eukaryotic-specific promoter. Six hours after infection, luminescence was measured in the infected host cells. DNA release is reported relative to uninfected (0%) and a holin lysis (100%) control strain.

**Table S1. Metal incorporation by ICP-MS**

| MBP-HD preparations | Metal: Protein stoichiometry* |      |      |      |      |      |      |
|---------------------|-------------------------------|------|------|------|------|------|------|
|                     | Mg                            | Mn   | Fe   | Co   | Ni   | Cu   | Zn   |
| WT no added metal   | 0.07                          | 0.17 | 0.81 | 0.00 | 0.00 | 0.01 | 0.30 |
| WT added Mn         | 0.05                          | 1.08 | 0.51 | 0.00 | 0.00 | 0.00 | 0.63 |
| WT added Fe         | 0.06                          | 0.24 | 0.92 | 0.00 | 0.00 | 0.01 | 0.66 |
| WT added Fe/Mn      | 0.06                          | 0.87 | 0.72 | 0.00 | 0.01 | 0.01 | 0.39 |
| H543A added Mn      | 0.02                          | 0.60 | 0.22 | 0.00 | 0.00 | 0.00 | 0.15 |
| D544A added Mn      | 0.04                          | 0.00 | 0.02 | 0.00 | 0.00 | 0.00 | 0.28 |

\*Average of two measurements.

**Table S2. Summary of crystallographic information, related to Fig. 4**

| Structure                       | c-di-AMP complex (Fe peak) | c-di-AMP complex (native) | Free HD domain    |
|---------------------------------|----------------------------|---------------------------|-------------------|
| Space group                     | $P6_1$                     | $P6_1$                    | $P6_1$            |
| Cell dimensions                 |                            |                           |                   |
| <i>a</i> , Å                    | 124.3                      | 124.3                     | 116.6             |
| <i>b</i> , Å                    | 124.3                      | 124.3                     | 116.6             |
| <i>c</i> , Å                    | 57.8                       | 58.0                      | 91.8              |
| $\alpha$ , °                    | 90                         | 90                        | 90                |
| $\beta$ , °                     | 90                         | 90                        | 90                |
| $\gamma$ , °                    | 120                        | 120                       | 120               |
| Wavelength, Å                   | 1.74                       | 1.10                      | 1.075             |
| Resolution, * Å                 | 25–2.7 (2.8–2.7)           | 25–2.1 (2.17–2.1)         | 25–2.4 (2.48–2.4) |
| No. of observations             | 51,226                     | 120,944                   | 105,385           |
| $R_{\text{merge}}$ , %          | 10.5 (33.8)                | 10.3 (40.8)               | 12.1 (40.6)       |
| $I/\sigma I$                    | 11.2 (3.0)                 | 12.9 (3.1)                | 10.7 (3.8)        |
| Redundancy                      | 3.7 (2.9)                  | 4.0 (3.7)                 | 3.8 (3.8)         |
| No. of reflections              | 14,184                     | 29,902                    | 27,525            |
| Completeness, %                 | 98 (91)                    | 99 (99)                   | 99 (98)           |
| $R_{\text{work}}$ , %           | —                          | 16.3 (19.4)               | 18.5 (27.0)       |
| $R_{\text{free}}^{\dagger}$ , % | —                          | 20.2 (26.4)               | 23.1 (32.7)       |
| rmsd                            |                            |                           |                   |
| Bond lengths, Å                 | —                          | 0.010                     | 0.009             |
| Bond angles, °                  | —                          | 1.2                       | 1.1               |

\*The numbers in parentheses are for the highest resolution shell.

<sup>†</sup>Five percent of the reflections were selected for free  $R$  calculation.**Table S3. Strains and plasmids used in this study**

| Strain number             | Plasmid no. | Genotype                                                     | Source     |
|---------------------------|-------------|--------------------------------------------------------------|------------|
| <i>L. monocytogenes</i> : |             |                                                              |            |
| JW06                      |             | <i>L. monocytogenes</i> 10403S                               |            |
| Derivatives of JW06:      |             |                                                              |            |
| JW467                     | —           | $\Delta pdeA$                                                | This study |
| JW221                     | —           | $\Delta pgpH$                                                | —          |
| JW468                     | —           | $\Delta pdeA \Delta pgpH$                                    | This study |
| JW469                     | —           | $tRNA^{Arg}::P_{\text{spac}}-pgpH^+ \Delta pgpH$             | This study |
| JW470                     | —           | $tRNA^{Arg}::P_{\text{spac}}-pdeA^+ \Delta pdeA$             | This study |
| JW471                     | —           | $tRNA^{Arg}::P_{\text{spac}}-pgpH^+ \Delta pdeA \Delta pgpH$ | This study |
| JW472                     | —           | $tRNA^{Arg}::P_{\text{spac}}-pdeA^+ \Delta pdeA \Delta pgpH$ | This study |
| <i>E. coli</i> :          |             |                                                              |            |
| JW473                     | pTNH46      | pMAL-c2x-PgpH HD (aa494-718) in BL21                         | This study |
| JW474                     | pTNH55      | As pTNH46 but H543A                                          | This study |
| JW475                     | pTNH56      | As pTNH46 but D544A                                          | This study |
